# Supplementary material
Source: PubMed Central journal article supplement (PMC4575766)
Supplement: NIHMS700367-supplement-supplement_1.pdf [file NIHMS700367-supplement-supplement_1.pdf]

**Supplemental Table 1. Race-stratified ten year atrial fibrillation incidence rate in the Health, Aging and Body Composition cohort, per 1000 person-years follow-up.**

| Adiposity Measures      | Category                     | Atrial Fibrillation Event Rate per 1000 Person-Years (95% CI) |                   |
|-------------------------|------------------------------|---------------------------------------------------------------|-------------------|
|                         |                              | Whites                                                        | Blacks            |
|                         | Overall                      | 19.7 (17.3, 22.1)                                             | 12.1 (9.9, 14.4)  |
| BMI                     | 18.5 to 25 kg/m <sup>2</sup> | 18.3 (14.4, 22.2)                                             | 13.0 (8.2, 17.8)  |
|                         | 25.1 to 30 kg/m <sup>2</sup> | 19.0 (15.5, 22.5)                                             | 10.0 (6.7, 13.3)  |
|                         | 30.1 to 40 kg/m <sup>2</sup> | 22.7 (16.0, 29.4)                                             | 14.6 (9.7, 19.5)  |
|                         | >40.1 kg/m <sup>2</sup>      | 29.9 (14.8, 45.0)                                             | 12.0 (5.7, 18.2)  |
| Abdominal circumference | 1 <sup>st</sup> Quartile     | 16.0 (11.7, 20.4)                                             | 11.0 (6.7, 15.3)  |
|                         | 2 <sup>nd</sup> Quartile     | 22.3 (17.4, 27.1)                                             | 9.3 (5.0, 13.7)   |
|                         | 3 <sup>rd</sup> Quartile     | 16.9 (12.5, 21.4)                                             | 11.8 (7.3, 16.2)  |
|                         | 4 <sup>th</sup> Quartile     | 23.6 (18.0, 29.1)                                             | 15.7 (10.9, 20.5) |
| SAT                     | 1 <sup>st</sup> Quartile     | 23.5 (18.3, 28.7)                                             | 11.5 (6.2, 16.8)  |
|                         | 2 <sup>nd</sup> Quartile     | 16.4 (12.1, 20.6)                                             | 11.8 (6.8, 16.9)  |
|                         | 3 <sup>rd</sup> Quartile     | 17.1 (12.6, 21.6)                                             | 13.5 (8.5, 18.5)  |
|                         | 4 <sup>th</sup> Quartile     | 20.2 (14.5, 25.9)                                             | 10.2 (6.6, 13.8)  |
| VAT                     | 1 <sup>st</sup> Quartile     | 16.7 (11.7, 21.6)                                             | 7.9 (4.7, 11.2)   |
|                         | 2 <sup>nd</sup> Quartile     | 18.6 (14.0, 23.2)                                             | 15.1 (9.9, 20.4)  |
|                         | 3 <sup>rd</sup> Quartile     | 19.5 (14.6, 24.3)                                             | 11.8 (7.3, 16.3)  |
|                         | 4 <sup>th</sup> Quartile     | 21.3 (16.6, 26.0)                                             | 12.8 (7.3, 18.3)  |
| Total Fat mass          | 1 <sup>st</sup> Quartile     | 20.9 (15.9, 25.8)                                             | 13.1 (8.1, 18.1)  |
|                         | 2 <sup>nd</sup> Quartile     | 19.4 (14.9, 23.9)                                             | 9.0 (4.7, 13.3)   |
|                         | 3 <sup>rd</sup> Quartile     | 15.5 (11.3, 19.6)                                             | 14.2 (9.1, 19.2)  |
|                         | 4 <sup>th</sup> Quartile     | 24.2 (18.2, 30.1)                                             | 11.3 (7.6, 15.1)  |
| Total percent fat       | 1 <sup>st</sup> Quartile     | 23.1 (17.6, 28.5)                                             | 12.0 (7.3, 16.6)  |
|                         | 2 <sup>nd</sup> Quartile     | 22.0 (17.0, 27.0)                                             | 16.6 (10.8, 22.5) |
|                         | 3 <sup>rd</sup> Quartile     | 15.6 (11.5, 19.8)                                             | 11.3 (6.8, 15.9)  |
|                         | 4 <sup>th</sup> Quartile     | 17.3 (12.4, 22.1)                                             | 9.1 (5.6, 12.7)   |

BMI indicates body mass index; SAT, subcutaneous abdominal fat; VAT, visceral abdominal fat; 95% CI, 95% confidence interval.

**Supplemental Table 2. Race stratified multivariable Cox proportional hazard models demonstrating the incident AF hazard ratio per 1-SD increment in each of the adiposity measures.**

|                                |        | Model 1                  |              | Model 2                  |              | Model 3           |      | Interaction |
|--------------------------------|--------|--------------------------|--------------|--------------------------|--------------|-------------------|------|-------------|
|                                |        | HR (95%CI)               | p            | HR (95%CI)               | p            | HR (95%CI)        | p    | p*          |
| <b>Anthropometry</b>           |        |                          |              |                          |              |                   |      |             |
| BMI                            | Whites | 1.14 (0.99, 1.32)        | 0.06         | 1.11 (0.96, 1.30)        | 0.16         | N/A               |      |             |
|                                | Blacks | 1.15 (0.96, 1.36)        | 0.12         | 1.13 (0.94, 1.36)        | 0.18         | N/A               |      | 0.45        |
| Abdominal circumference        | Whites | 1.09 (0.97, 1.26)        | 0.15         | 1.08 (0.94, 1.23)        | 0.29         | N/A               |      |             |
|                                | Blacks | <b>1.27 (1.07, 1.50)</b> | <b>0.005</b> | <b>1.27 (1.06, 1.52)</b> | <b>0.009</b> | N/A               |      | 0.14        |
| <b>Computerized tomography</b> |        |                          |              |                          |              |                   |      |             |
| SAT                            | Whites | 1.17 (0.99, 1.39)        | 0.07         | 1.16 (0.98, 1.38)        | 0.09         | N/A               |      |             |
|                                | Blacks | 1.00 (0.81, 1.23)        | 0.99         | 0.98 (0.78, 1.22)        | 0.98         | N/A               |      | 0.70        |
| VAT                            | Whites | 1.07 (0.95, 1.21)        | 0.25         | 1.04 (0.92, 1.19)        | 0.53         | 0.97 (0.82, 1.15) | 0.74 |             |
|                                | Blacks | 1.21 (0.99, 1.48)        | 0.06         | 1.16 (0.93, 1.45)        | 0.19         | 1.16 (0.90, 1.50) | 0.26 | 0.62        |
| Sum of SAT plus VAT            | Whites | 1.14 (0.98, 1.31)        | 0.08         | 1.12 (0.96, 1.30)        | 0.15         | N/A               |      |             |
|                                | Blacks | 1.08 (0.88, 1.31)        | 0.48         | 1.04 (0.84, 1.29)        | 0.75         | N/A               |      | 0.93        |
| <b>DXA scan</b>                |        |                          |              |                          |              |                   |      |             |
| Total fat mass                 | Whites | 1.19 (1.03, 1.37)        | 0.018        | 1.16 (0.99, 1.34)        | 0.06         | N/A               |      |             |
|                                | Blacks | 1.05 (0.87, 1.27)        | 0.60         | 1.04 (0.86, 1.27)        | 0.66         | N/A               |      | 0.90        |
| Total percent fat              | Whites | 1.10 (0.90, 1.35)        | 0.36         | 1.06 (0.85, 1.31)        | 0.62         | 0.96 (0.70, 1.30) | 0.77 |             |
|                                | Blacks | 0.92 (0.70, 1.21)        | 0.54         | 0.92 (0.69, 1.23)        | 0.58         | 0.74 (0.47, 1.15) | 0.18 | 0.64        |

Model 1: adiposity measure, age, sex, race, and site. Model 2: model 1 + smoking, systolic and diastolic BP, treatment for hypertension, total to HDL cholesterol ratio, heart rate, ECG LVH, PR interval, prevalent heart failure, coronary artery disease, and diabetes. Model 3: model 2 + BMI. WHR indicates abdominal to thigh circumference ratio (waist to hip ratio); SAT, subcutaneous abdominal fat; VAT, visceral abdominal fat; DXA, dual-energy X-ray absorptiometry; HR, hazard ratio; 95% CI, 95% confidence interval. \*P-value for interaction between each adiposity measure and race (derived from model 2).

**Supplemental Table 3. Sex stratified multivariable Cox proportional hazard models demonstrating the incident AF hazard ratio per 1-SD increment in each of the adiposity measures.**

|                                |        | Model 1           |       | Model 2           |      | Model 3           |      | Interaction |
|--------------------------------|--------|-------------------|-------|-------------------|------|-------------------|------|-------------|
|                                |        | HR (95%CI)        | p     | HR (95%CI)        | p    | HR (95%CI)        | p    | p*          |
| <b>Anthropometry</b>           |        |                   |       |                   |      |                   |      |             |
| BMI                            | Male   | 1.20 (1.08, 1.18) | 0.026 | 1.18 (0.99, 1.39) | 0.06 | N/A               |      |             |
|                                | Female | 1.10 (0.95, 1.28) | 0.20  | 1.09 (0.93, 1.28) | 0.27 | N/A               |      | 0.64        |
| Abdominal circumference        | Male   | 1.14(1.001, 1.29) | 0.048 | 1.13 (0.98, 1.30) | 0.09 | N/A               |      |             |
|                                | Female | 1.17 (1.01, 1.36) | 0.043 | 1.16 (0.99, 1.37) | 0.06 | N/A               |      | 0.14        |
| <b>Computerized tomography</b> |        |                   |       |                   |      |                   |      |             |
| SAT                            | Male   | 1.12 (0.92, 1.37) | 0.24  | 1.11 (0.90, 1.36) | 0.33 | N/A               |      |             |
|                                | Female | 1.09 (0.92, 1.30) | 0.33  | 1.10 (0.92, 1.32) | 0.29 | N/A               |      | 0.96        |
| VAT                            | Male   | 1.09 (0.96, 1.24) | 0.20  | 1.04 (0.91, 1.20) | 0.56 | 0.94 (0.79, 1.54) | 0.52 |             |
|                                | Female | 1.13 (0.95, 1,35) | 0.17  | 1.10 (0.91, 1.35) | 0.32 | 1.09 (0.86, 1.39) | 0.47 | 0.75        |
| Sum of SAT plus VAT            | Male   | 1.10 (0.93, 1.31) | 0.25  | 1.10 (0.92, 1.32) | 0.28 | N/A               |      |             |
|                                | Female | 1.13 (0.96, 1.32) | 0.14  | 1.10 (0.92, 1.30) | 0.30 | N/A               |      | 0.94        |
| <b>DXA scan</b>                |        |                   |       |                   |      |                   |      |             |
| Total fat mass                 | Male   | 1.17 (0.99, 1.38) | 0.06  | 1.14 (0.96, 1.35) | 0.15 | N/A               |      |             |
|                                | Female | 1.11 (0.95, 1.30) | 0.20  | 1.10 (0.94, 1.30) | 0.24 | N/A               |      | 0.89        |
| Total percent fat              | Male   | 1.05 (0.84, 1.32) | 0.67  | 0.99 (0.78, 1.27) | 0.97 | 0.80 (0.56, 1.13) | 0.20 |             |
|                                | Female | 1.03 (0.81, 1.30) | 0.83  | 1.04 (0.81, 1.32) | 0.77 | 0.99 (0.68, 1.44) | 0.96 | 0.84        |

Model 1: adiposity measure, age, sex, race, and site. Model 2: model 1 + smoking, systolic and diastolic BP, treatment for hypertension, total to HDL cholesterol ratio, heart rate, ECG LVH, PR interval, prevalent heart failure, coronary artery disease, and diabetes. Model 3: model 2 + BMI. WHR indicates abdominal to thigh circumference ratio (waist to hip ratio); SAT, subcutaneous abdominal fat; VAT, visceral abdominal fat; DXA, dual-energy X-ray absorptiometry; HR, hazard ratio; 95% CI, 95% confidence interval. \*P-value for interaction between each adiposity measure and race (derived from model 2).
